# Supplementary material for: Immune evasion of Borrelia miyamotoi: CbiA, a novel outer surface protein exhibiting complement binding and inactivating properties
Source: Springer Nature journal article supplement (doi:10.1038/s41598-017-00412-4), 2017-03-16
Supplement: MOESM1 [file 41598_2017_412_MOESM1_ESM.pdf]

## *Supplementary Information*

### **Immune evasion of *Borrelia miyamotoi*: CbiA, a novel outer surface protein exhibiting complement binding and inactivating properties**

Florian Röttgerding<sup>1</sup>, Alex Wagemakers<sup>2†</sup>, Joris Koetsveld<sup>2†</sup>, Volker Fingerle<sup>3</sup>, Michael Kirschfink<sup>4</sup>, Joppe W. Hovius<sup>2</sup>, Peter F. Zipfel<sup>5,6</sup>, Reinhard Wallich<sup>4</sup>, and Peter Kraiczy<sup>1\*</sup>

<sup>1</sup>Institute of Medical Microbiology and Infection Control, University Hospital of Frankfurt, Frankfurt, Germany

<sup>2</sup>Center for Experimental and Molecular Medicine, Academic Medical Center, Amsterdam, The Netherlands

<sup>3</sup>National Reference Center for Borrelia, Oberschleißheim, Germany

<sup>4</sup>Institute of Immunology, University of Heidelberg, Heidelberg, Germany

<sup>5</sup>Institute of Immunology, University of Heidelberg, Heidelberg, Germany

<sup>6</sup>Friedrich Schiller University, Jena, Germany

† A.W. and J.K. contributed equally to this study

Corresponding author: Dr. Peter Kraiczy, Institute of Medical Microbiology and Infection Control, University Hospital of Frankfurt, Paul-Ehrlich-Str. 40, D-60596 Frankfurt, Germany, Phone: +49-69-6301-7165, E-mail: Kraiczy@em.uni-frankfurt.de

## Supplementary Figure S1

|           |            |             |            |                    |                   |     |
|-----------|------------|-------------|------------|--------------------|-------------------|-----|
|           |            |             | 20         |                    | 40                |     |
| CbiA      | MHYIKKYLLF | ILLL-NLINC  | NLFNKNKNLD | HNLQPNKINN         | IISSLDSNQK        | 49  |
| BhCRASP-1 | MQLTKKYLPA | ILLLLSLASC  | DLFYKNRNSN | ANL-----           | -LKTLDNNQK        | 42  |
| BpcA      | MK--KKCLLT | ILLL-SLVNC  | GLLSKNKNSE | TSL-----           | -LNTLDNNQK        | 39  |
| HcpA      | M---RLYLS  | MALLLSIIGC  | ELLSKNAN-- | --LQPKTLET         | LESNIDDGQK        | 42  |
| BtcA      | MK--KKCLLT | IILL-SLVSC  | GLSSKNKNSE | TSLL-NIETN         | LLNTLDDNQK        | 46  |
|           |            | 60          |            | 80                 |                   | 100 |
| CbiA      | QALISFKNLV | NNKQYSKDLE  | QASKSYLEDL | KKNNQDLNLQ         | NKLNQELNCD        | 99  |
| BhCRASP-1 | QALIYFKDTL | QDKKYLSYLT  | TSQKNFLDDL | EKNKKAPGLQ         | YKLKKTLSSE        | 92  |
| BpcA      | QALITFKDLL | QDNHRSILE   | KQKKSILKDL | EKHQENSNLQ         | DKLKKTLNSE        | 89  |
| HcpA      | QALAFFQESL | QDNKHLDAK   | QAQSALLKDI | K-----             | DKPQKTLNFK        | 83  |
| BtcA      | QALITFKDLL | QDKKHLSEILE | KQKKSILEDL | KANQKNYNLQ         | DKLKKTLNSE        | 96  |
|           |            | 120         |            | 140                |                   |     |
| CbiA      | YDDSKIEKLF | AQLGNDKMKK  | FLQQLHLMLK | SINDGTLISF         | SSSNFRDTT-        | 148 |
| BhCRASP-1 | YDESQFNKLL | NELGNAKAKQ  | FLQQLHIMLQ | SIKDGTLSF          | SSANFNDL-Q        | 141 |
| BpcA      | YDKTQLNKLF | DELGNIKTKQ  | FLQQLHIMLK | SINNGTLSF          | SSSNFKDSNQ        | 139 |
| HcpA      | YNKTKLEQLF | RKLGNDKTKQ  | FLKNLHVTIK | FINNGSFQSF         | SSANFNDLD-        | 132 |
| BtcA      | YDKNQLNKLF | DELGNIKTKQ  | FLQQLHIILQ | SIKD <u>GKPTNF</u> | ASSNFN <u>LNQ</u> | 146 |
|           |            | 160         |            | 180                |                   |     |
| CbiA      | TLSQKKERAL | EYIKRQLYIE  | FYFHSNDISD | TEFFFQRTIK         | LLETQS            | 194 |
| BhCRASP-1 | NLEQKKERAL | QSINGELYVE  | YYFYINGISN | PDNFFEKIMQ         | NLKT--            | 185 |
| BpcA      | TLEQKKEQAL | QYIKGQLYTD  | YYLYINGIQD | ANYFFERIMS         | VLEI--            | 183 |
| HcpA      | TLEKKQERAI | NSIKEELYVN  | YYLYTNELVD | LDYFFYRAMN         | YL---S            | 175 |
| BtcA      | TLEQKKEQAL | KYIKDKLYTD  | YYLYINGIQD | ANYFFERIMS         | LLE---S           | 190 |

**Alignment of proteins of relapsing fever spirochetes.** Deduced amino acid sequences of CbiA, BhCRASP-1, BpcA, HcpA, and BtcA were aligned using CLC Sequence Viewer, Version 7.7 (Qiagen, Aarhus). Conserved residues are highlighted in light grey and the proposed FH-binding region derived from BhCRASP-1 is underlined. Asterisk indicates the introduced stop codon at position 133 to generate mutant CbiA<sub>20-132</sub> lacking 62 aa at the C-terminus.

# Supplementary Figure S2

## CbiA alpha helix prediction

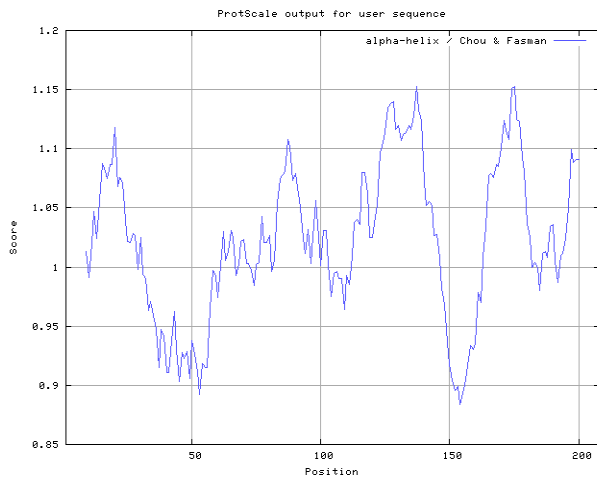

## coiled coil prediction

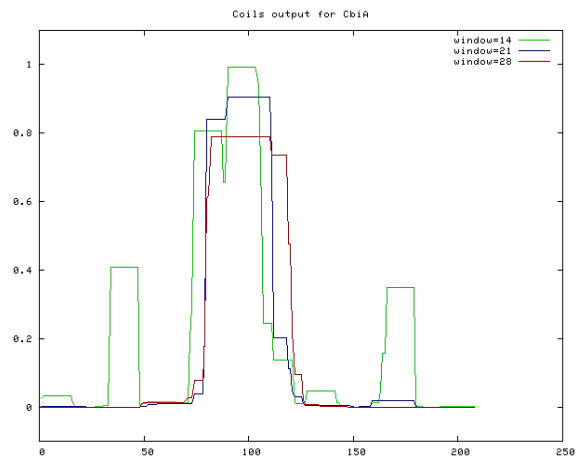

## BhCRASP-1

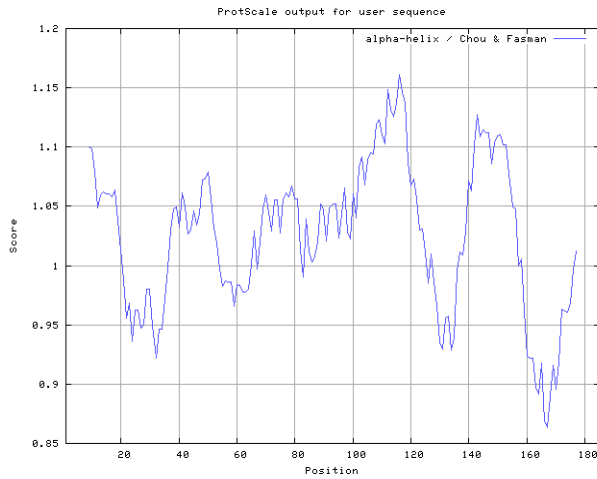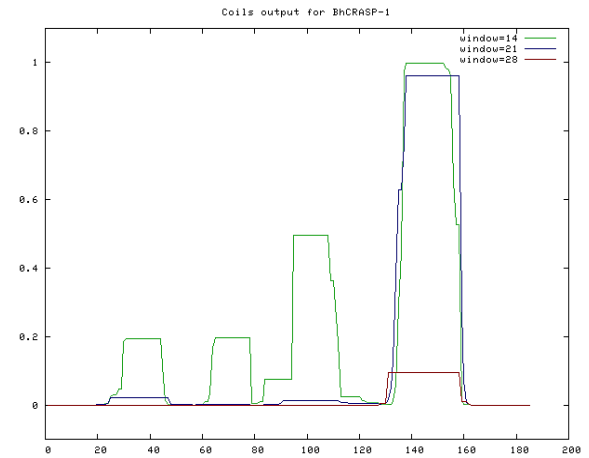

## FhbA

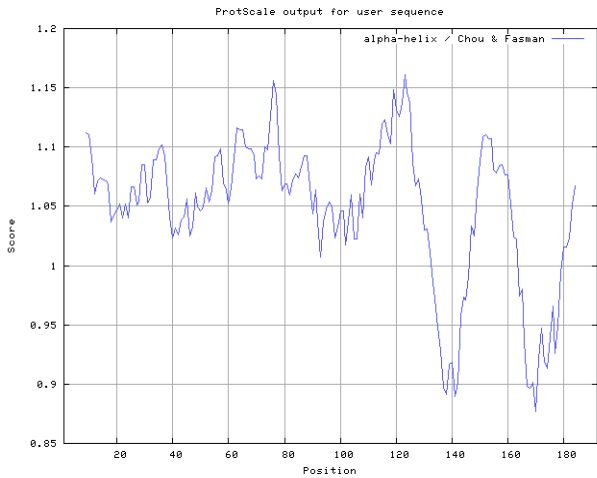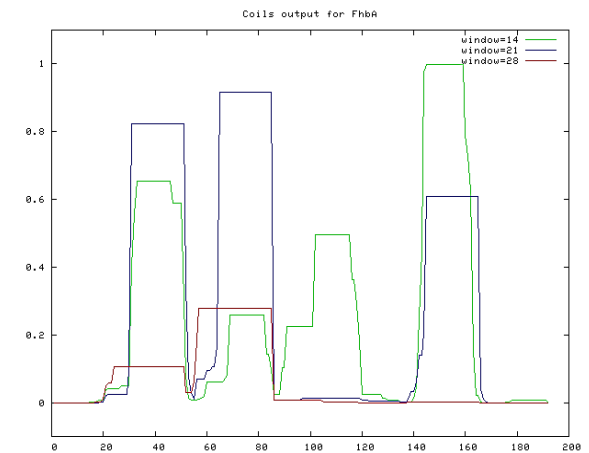

The predicted probability of  $\alpha$ -helices and coiled coils structures within CbiA was assessed using ProtScale and COILS ([www.expasy.org](http://www.expasy.org)). COILS was performed with (2.5) and without weighting by using a 14-, 21-, and 28-amino-acid window.

## Supplementary Figure S3

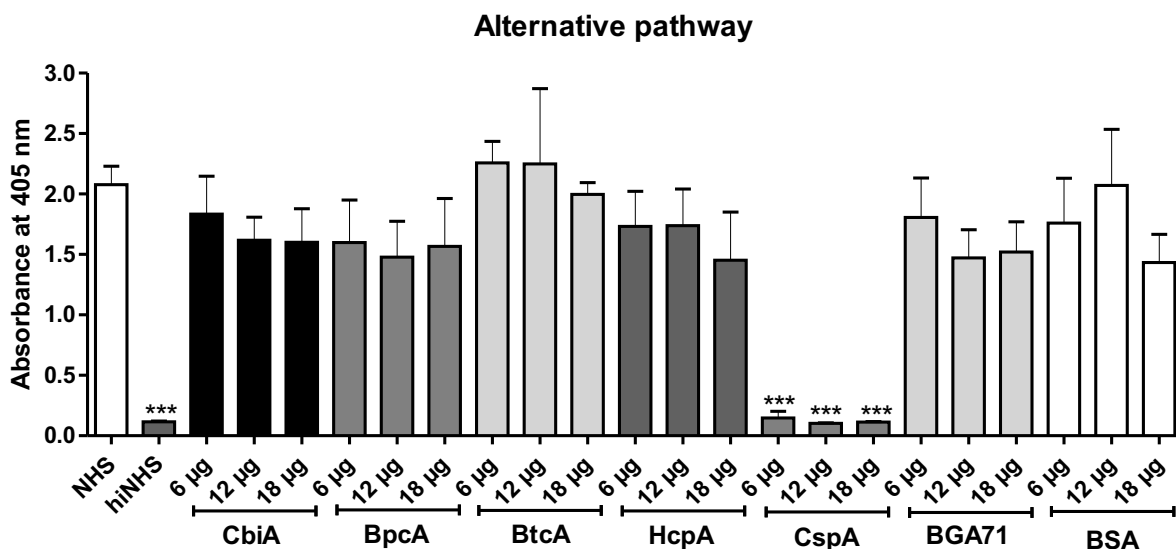

**Complement inhibition of borrelial proteins on the alternative pathway.** The inhibitory capacity of borrelial proteins on the alternative pathway was analyzed by Wielisa® (Euro Diagnostica, Malmö, Sweden). NHS diluted 1:18 was pre-incubated with increasing concentrations (6, 12, 18 µg/ml each) of borrelial proteins or BSA (negative control) and then added to microtiter plates coated with LPS. Following incubation, C5b-9 deposition was measured using an anti-C5b-9 mAb at 405 nm. Means from three independent experiments are shown and error bars correspond to SD. Raw data were analyzed using one-way ANOVA with post hoc Bonferroni correction. \*\*\*,  $P = .001$ , \*\*,  $P = .01$ , \*,  $P = .05$ .

# Supplementary Figure S4

## Uncropped gel and Western blots of figure 1

### Panel 1B

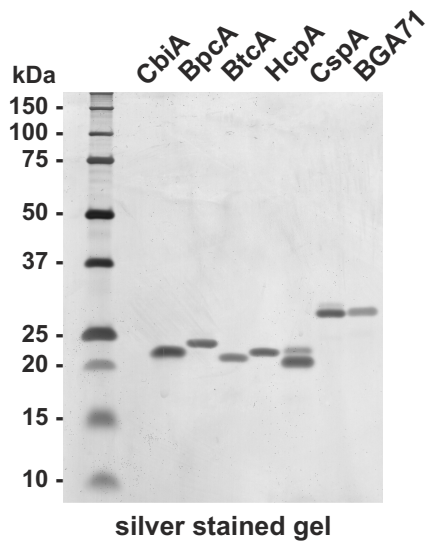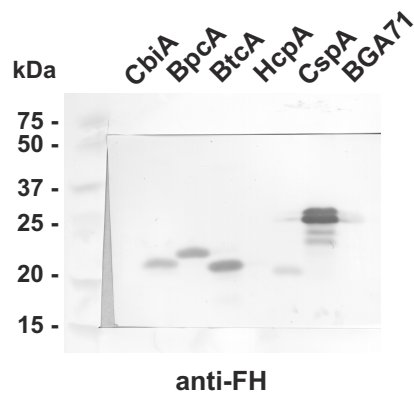

### Panel 1D

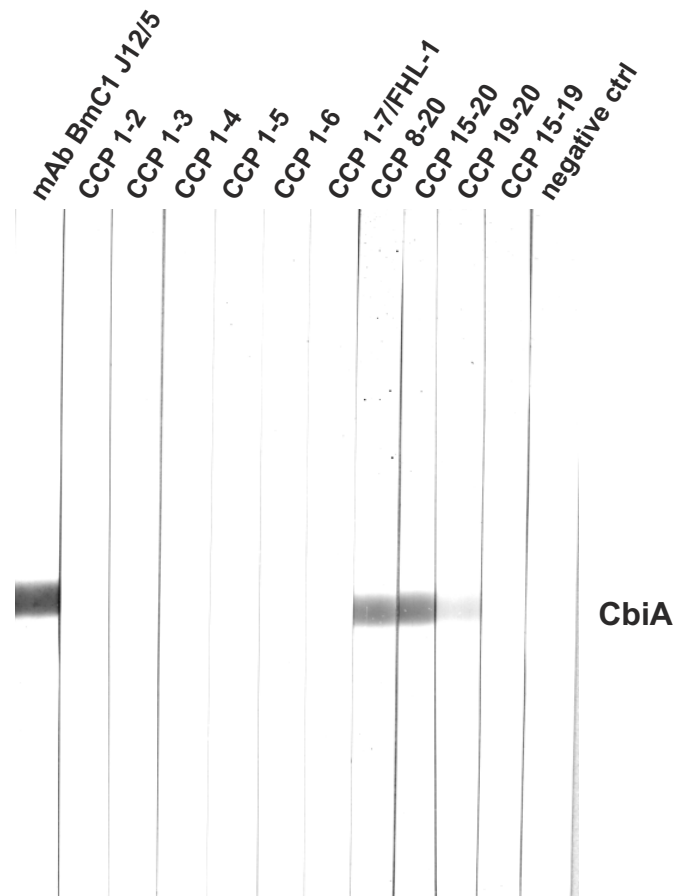

### Panel 1E

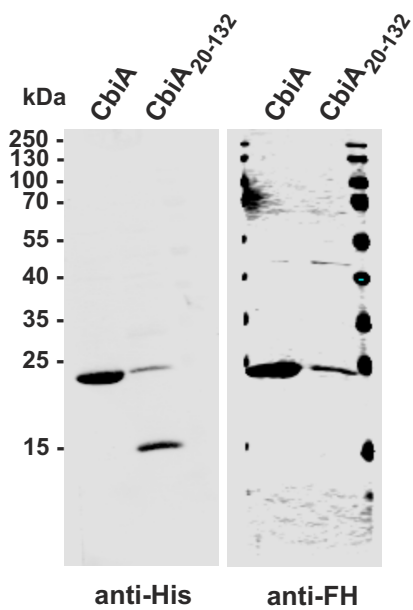

# Supplementary Figure S5

## Full-length Western blots of figure 2

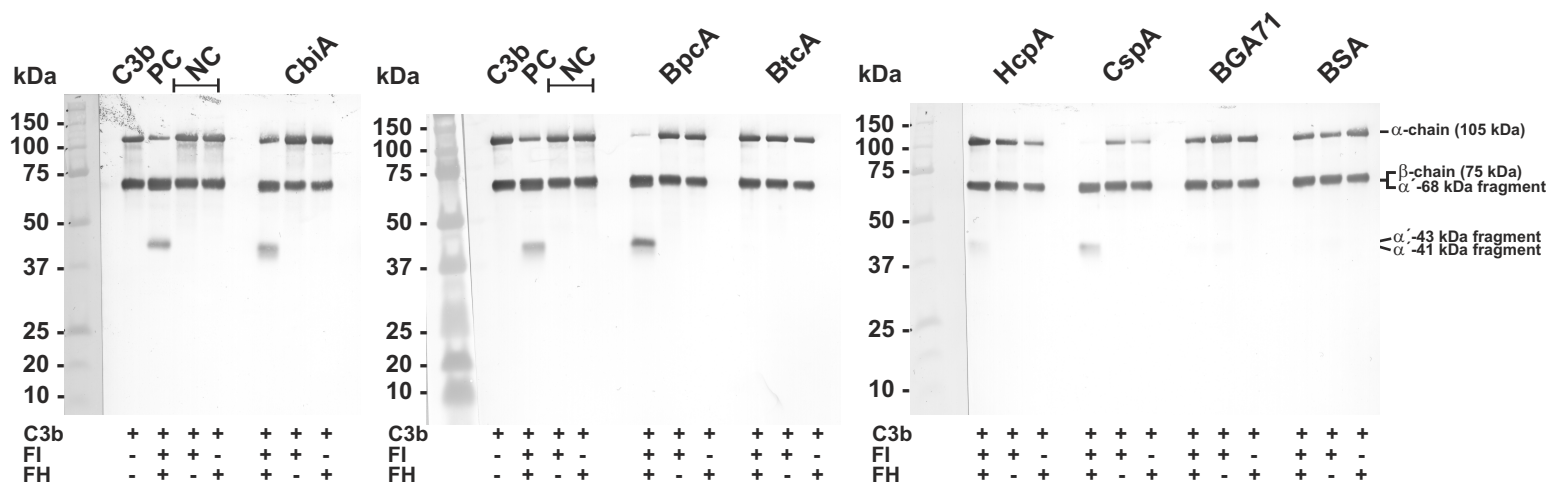

## Supplementary Figure S6

### Full-length Western blot of figure 5, panel B

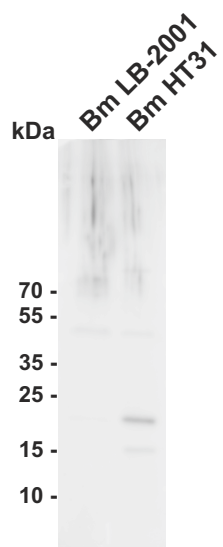





## Supplementary Figure S8

### Full-length Western blots of figure 7, panel B

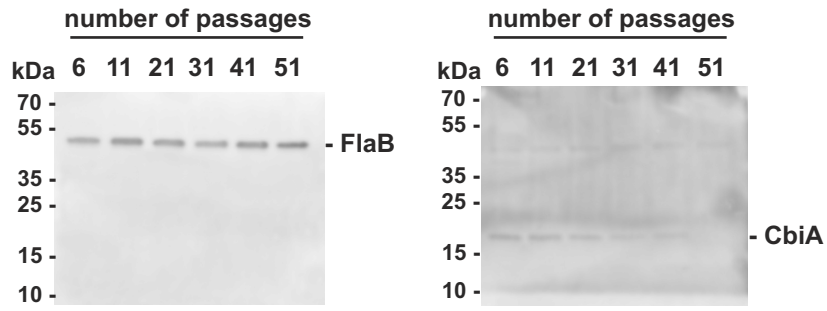

# Supplementary Figure S9

## Full-length Western blot of figure 8

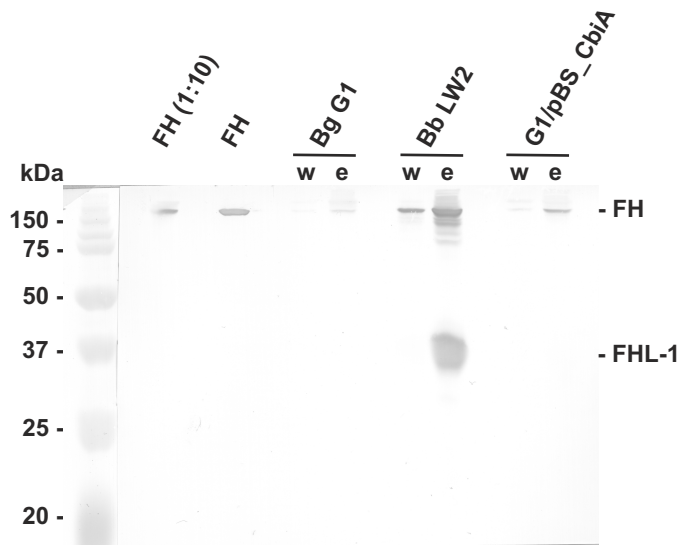

**Supplementary Table S1. Oligonucleotides used in this study**

| Oligonucleotide | Sequence (5'-3') <sup>a</sup>     | Use in this work                                                         |
|-----------------|-----------------------------------|--------------------------------------------------------------------------|
| cbiA F00        | ATCTCAATATGCACTATATTTTC           | Cloning of <i>cbiA</i>                                                   |
| cbiA R0         | CTGCAGTATCGATTTTATATGTA CTCTTC    | Cloning of <i>cbiA</i>                                                   |
| cbiA Bam        | CTATTATTAACCTTATCGGATCCAATTTATTC  | Cloning of <i>cbiA</i> in pQE-30 Xa;<br>generation of His-tagged protein |
| cbiA Bam        | CGAAGGATCCATGCACTATATTA AAAAATATC | Cloning of <i>cbiA</i> in pBSVA                                          |
| cbiA Sph        | CGTTTG CATGCACTCTTTCTCAGAAG       | Cloning of <i>cbiA</i> in pBSVA                                          |
| BtBam           | GTCTTGTTGGATCCGGTTTATCAAG         | Cloning of <i>btcA</i> in pQE-30 Xa;<br>generation of His-tagged protein |
| BtSal           | TATGTCGACTTAACTTTCTAAAAGTG        |                                                                          |
| glpQ FW         | TCATGCTTTAAACAAGAAATG             | qRT-PCR of <i>glpQ</i>                                                   |
| glpQ RV         | TCTAGCTCGATTGGGAAATAATTG          | qRT-PCR of <i>glpQ</i>                                                   |
| cbiA FW         | AGAGCAAGCAAGCAAAAAGTT             | qRT-PCR of <i>cbiA</i>                                                   |
| cbiA RV         | AAGCTTATAAGTGTGCCGTCATT           | qRT-PCR of <i>cbiA</i>                                                   |

<sup>a</sup>, Sequences of specific restriction endonuclease recognition sites are underlined.
